# Supplementary material for: Characteristics of patients discontinuing outpatient services under long-term care insurance and its effect on frailty during COVID-19
Source: PeerJ. 2021 Apr 5;9:e11160. doi: 10.7717/peerj.11160 (PMC8029655; doi:10.7717/peerj.11160)
Supplement: Supplemental Information 1 [file peerj-09-11160-s001.xlsx]

## Sheet: raw data
									5m walking test		April 2020 Frailty Screening Index							September 2020 Frailty Screening Index
No.	0=Continuing group 1=Discontinued group	Gender	Gender	Long-term care level	Age	Height	Weight	Grip strength	Time	Speed	Weight Loss	Low physical function	Low physical activity	Cognition	Exhaustion	Total score	0=Robust 1=Pre-frailty 2=Frailty	Weight Loss	Low physical function	Low physical activity	Cognition	Exhaustion	Total score	0=Robust 1=Pre-frailty 2=Frailty
247002	0	0	M	4	84	160.9	55	11.9	15.3	0.326797	1	1	0	0	0	2	1	1	1	0	0	0	2	1
247004	0	0	M	2	68	167.2	65	28.8	10.8	0.462963	0	0	0	0	0	0	0	1	0	0	0	0	1	1
247005	0	1	F	2	59	148.3	72	24	14.25	0.350877	1	0	0	0	0	1	1	1	0	0	0	0	1	1
247008	0	0	M	4	85	155.65	55	23.3	5.6	0.892857	1	0	0	0	0	1	1	1	0	0	0	0	1	1
247009	1	1	F	4	71	165.1	63	29	9.9	0.505051
247013	0	1	F	3	79	150.4	45	17.4	28.65	0.17452
247014	0	1	F	1	86	147.25	39	15	5.94	0.841751	1	0	1	0	0	2	1	0	0	1	0	1	2	1
247017	0	1	F	2	73	139.9	53	11.6	6.66	0.750751	0	0	0	0	0	0	0	1	1	0	0	0	2	1
247018	0	0	M	4	72	161.95	50	24.3	15.54	0.32175
247019	0	1	F	1	77	149.35	62	25.3	8.66	0.577367	0	1	0	0	0	1	1	0	1	0	0	0	1	1
247020	0	0	M	6	76	156.7	78	29.9	36.09	0.138543	0	0	0	0	0	0	0	1	0	0	0	0	1	1
247024	0	1	F	3	74	145.15	46	11.8	6.08	0.822368	0	1	0	0	1	2	1	0	1	0	0	1	2	1
247029	0	0	M	3	87	154.6	64	25.1	11.15	0.44843	0	0	0	0	0	0	0	0	0	0	0	0	0	0
247031	0	1	F	4	76	150.4	49	12.8	61.32	0.0815395	0	0	0	0	0	0	0	0	0	0	0	0	0	0
247033	0	0	M	3	74	160.9	68	33.1	11.56	0.432526	0	1	0	1	0	2	1	0	1	0	1	1	3	2
247037	0	0	M	2	59	174.55	114	30.2	8.4	0.595238	0	1	0	0	0	1	1	0	0	0	0	0	0	0
247040	0	0	M	3	70	161.95	68	31.1	5.28	0.94697
247043	1	0	M	2	86	170.35	54	21.8	4.78	1.04603	1	1	1	0	0	3	2	1	1	0	0	0	2	1
247046	0	0	M	4	76	166.15	68	37.2	16.04	0.311721
247047	0	0	M	3	74	161.95	59	28.5	4.87	1.02669	0	0	0	0	0	0	0	0	0	0	0	0	0	0
247049	0	0	M	3	78	165.1	58	31.2	25.62	0.19516	0	0	0	0	0	0	0	0	0	0	0	0	0	0
247053	0	1	F	3	72	149.35	65	0	7.95	0.628931	0	0	0	0	1	1	1	0	0	0	0	0	0	0
247054	0	0	M	3	77	168.25	65	31.2	7.31	0.683995	0	0	0	0	0	0	0	0	0	0	0	0	0	0
247060	0	1	F	4	79	149.35	36	12.9	11.72	0.426621	0	1	0	0	0	1	1	1	1	0	0	0	2	1
247062	1	0	M	3	71	171.4	63	25.5	11	0.454545
247064	0	1	F	4	96	149.35	49	21.1	28.12	0.177809	1	1	0	0	1	3	2	0	1	0	0	0	1	1
247068	0	0	M	5	64	165.1	72	27.4	35.86	0.139431	0	1	0	0	0	1	1	0	1	0	0	0	1	1
247069	1	0	M	1	68	168.25	59	29.4	6.19	0.807754	0	0	0	0	0	0	0	0	0	0	0	0	0	0
247070	0	0	M	4	75	161.95	71	25.3	16.25	0.307692
247071	0	1	F	3	79	158.8	51	13.8	9.47	0.527983
247076	1	0	M	2	90	164.05	46.4	18.8	5.82	0.859107	0	0	0	0	1	1	1	0	0	0	0	1	1	1
247077	1	1	F	1	83	155.65	48.9	23.2	5.68	0.880282	0	0	0	0	1	1	1	0	0	0	0	1	1	1
247078	0	1	F	1	86	158.8	46	20.1	4.19	1.19332	0	0	0	0	1	1	1	0	0	0	0	1	1	1
247081	0	1	F	3	68	156.7	48	20.8	14	0.357143	1	0	0	0	0	1	1	1	0	0	0	0	1	1
247082	0	0	M	3	82	165.1	53	14.4	28.37	0.176243
247083	1	0	M	1	77	170.35	82	32.6	7.03	0.711238
247084	0	1	F	3	70	153.55	45	15.6	5.69	0.878735
247085	1	1	F	3	76	147.25	56	10.6	12.77	0.391543
247088	0	1	F	3	71	155.65	77	23.4	13.06	0.382848	0	0	0	0	0	0	0	0	0	0	0	0	0	0
247089	0	1	F	5	76	147.25	38	15.4	83.43	0.0599305	0	1	0	0	0	1	1	0	1	0	0	0	1	1
247090	0	0	M	3	69	170.35	78	40	25.46	0.196386	0	1	0	0	0	1	1	0	1	0	0	0	1	1
247094	0	0	M	4	84	160.9	67	22.5	6.06	0.825083	0	1	0	0	0	1	1	0	0	0	0	0	0	0
247100	0	0	M	1	91	157.75	55	25.4	4.89	1.02249	0	0	0	0	0	0	0	0	0	0	0	0	0	0
247102	0	1	F	4	88	149.35	45	13.3	7.64	0.65445	0	0	0	0	0	0	0	0	1	0	0	0	1	1
247105	1	0	M	4	73	159.85	60	27.5	4.44	1.12613	0	0	0	0	0	0	0	0	0	0	0	0	0	0
247106	0	0	M	4	73	152.5	58	25.7	39.39	0.126936	0	0	0	1	0	1	1	0	0	0	1	0	1	1
247111	0	1	F	4	82	146.2	43	13.2	19.63	0.254712	1	0	0	0	1	2	1	0	0	0	0	0	0	0
247114	0	0	M	2	63	179.8	78	50.3	16.32	0.306373	0	0	0	0	0	0	0	0	0	0	0	0	0	0
247116	0	0	M	1	75	164.05	66	36.6	4.44	1.12613
247118	0	0	M	3	74	171.4	72	27.6	16.5	0.30303
247119	0	0	M	3	94	158.8	43	18.3	8.66	0.577367
247120	0	1	F	3	89	154.6	44	15	5.53	0.904159
247123	0	1	F	2	75	150.4	56	16.3	26.28	0.190259	0	0	0	0	0	0	0	0	0	0	0	0	0	0
247124	0	0	M	2	78	154.6	50	20	13.67	0.365764	0	0	0	0	0	0	0	0	1	0	0	0	1	1
247132	0	1	F	3	85	151.45	56	14.4	7	0.714286	0	0	0	0	0	0	0	0	0	0	0	0	0	0
247137	1	1	F	5	70	149.35	54	6.8	30.21	0.165508	0	0	0	0	0	0	0	0	0	0	0	0	0	0
247139	0	1	F	4	88	152.5	53	17.2	10.08	0.496032	0	0	0	0	0	0	0	0	0	0	0	0	0	0
247143	0	1	F	1	66	152.5	61	24.7	5.09	0.982318	0	1	0	0	0	1	1	0	0	0	0	0	0	0
247144	1	0	M	2	75	166.15	59	27.4	5.3	0.943396	1	1	1	0	1	4	2	1	1	0	0	0	2	1
247146	0	0	M	1	77	167.2	52	24.3	5.61	0.891266	0	1	0	0	0	1	1	0	1	0	0	0	1	1
247155	0	0	M	4	77	167.2	78	30.2	34.62	0.144425	0	0	0	0	0	0	0	0	0	0	0	0	0	0
247168	0	0	M	1	75	159.85	55.4	23.7	7.81	0.640205	1	0	0	0	0	1	1	0	1	0	0	0	1	1
247169	0	0	M	2	82	158.8	61	13.8	7.31	0.683995	0	0	0	0	0	0	0	0	0	0	0	0	0	0
247174	1	0	M	3	68	170.35	72	30.3	7.38	0.677507	0	0	0	0	0	0	0	0	0	0	0	0	0	0
247178	0	1	F	3	89	163	70	22.3	5.84	0.856164	0	0	1	0	0	1	1	0	1	1	1	0	3	2
247185	0	0	M	5	82	157.75	47	24.9	8.45	0.591716	0	1	0	0	0	1	1	1	0	0	0	0	1	1
247188	1	1	F	1	82	160.9	61	18.7	2.92	1.71233	0	0	0	0	1	1	1	0	0	0	0	1	1	1
247191	0	1	F	5	78	159.85	57	13.5	11.2	0.446429	0	1	0	1	0	2	1	1	1	0	1	0	3	2
247192	0	1	F	6	73	154.6	46	13.5	37.71	0.132591	0	0	0	0	0	0	0	0	0	0	0	0	0	0
247193	1	1	F	1	73	153.55	62	17.1	4.4	1.13636
247195	0	1	F	1	69	158.8	66	19.9	4.65	1.07527	1	1	1	0	1	4	2	0	0	0	0	1	1	1
247199	0	1	F	3	86	156.7	60	9.4	9.2	0.543478
247201	0	0	M	3	78	161.95	53	27.8	10.56	0.473485
247206	1	1	F	2	81	154.6	72	24	4.98	1.00402	1	1	1	0	1	4	2	1	1	1	0	1	4	2
247207	1	0	M	4	78	167.2	59	27.3	5.68	0.880282	0	0	1	0	0	1	1	1	0	0	1	1	3	2
247212	1	1	F	1	89	155.65	49	23	5.11	0.978474	0	1	1	0	0	2	1	0	1	1	0	0	2	1
247213	0	0	M	3	84	160.9	63	25.5	21.62	0.231267	1	0	0	0	0	1	1	1	0	0	0	0	1	1
247214	0	0	M	1	71	169.3	54	31.1	7.13	0.701262	0	0	0	0	0	0	0	0	1	0	0	0	1	1
247219	0	0	M	3	65	158.8	45	15.7	16.29	0.306937	0	0	0	0	0	0	0	0	0	0	0	0	0	0
247220	0	0	M	5	85	153.55	58	22.4	6.5	0.769231
247223	0	0	M	1	77	175.6	72	41.3	17.5	0.285714	0	0	0	0	0	0	0	0	0	0	0	0	0	0
247224	1	0	M	2	78	154.18	75	20.8	3.69	1.35501	0	0	1	0	0	1	1	0	1	0	0	0	1	1
247225	0	0	M	3	83	156.7	62	20.4	4.55	1.0989
247228	1	1	F	4	68	160.48	67	24.2	9.03	0.55371	0	1	1	0	1	3	2	0	1	1	0	1	3	2
247229	0	1	F	1	90	142	53	19.9	4.89	1.02249	1	0	1	0	1	3	2	1	0	0	0	1	2	1
247230	0	1	F	3	86	148.3	45	18.2	31.71	0.157679	0	1	1	0	1	3	2	0	1	0	0	1	2	1
247233	0	0	M	3	78	165.94	61	33.3	25.79	0.193874	0	0	0	0	0	0	0	0	0	0	0	0	0	0
247235	1	1	F	1	83	152.5	45	18.5	4.93	1.0142	0	1	0	0	0	1	1	0	1	0	0	1	2	1
247237	0	1	F	3	86	147.25	42	7.1	14.69	0.340368	0	1	0	0	1	2	1	0	1	0	0	0	1	1
247240	0	0	M	5	61	167.83	72	35.4	4.78	1.04603	0	0	0	0	0	0	0	0	1	0	0	0	1	1
247241	0	1	F	3	79	152.5	46	18.1	8.44	0.592417	0	0	0	0	0	0	0	0	0	0	0	0	0	0
247243	0	0	M	2	72	169.3	72	30	6.75	0.740741	0	0	0	0	0	0	0	0	0	0	0	0	0	0
247245	1	1	F	3	93	153.55	47	19.6	6.31	0.792393
247246	0	0	M	2	74	166.15	66	16.8	4.4	1.13636	0	0	0	0	0	0	0	0	0	0	0	0	0	0
247248	0	0	M	3	88	169.3	66	22.8	5.22	0.957854	0	1	0	0	0	1	1	0	1	0	0	0	1	1
247249	0	1	F	3	84	145.15	59	12.6	11.43	0.437445	0	0	0	0	0	0	0	1	0	0	0	0	1	1
247253	1	0	M	3	62	164.05	59	39.8	3.71	1.34771	0	0	0	1	1	2	1	0	0	0	0	0	0	0
247256	0	0	M	4	57	180.85	82	33.4	7.22	0.692521	1	0	0	0	0	1	1	1	0	0	0	0	1	1
247258	0	0	M	1	83	163	63.1	27.2	3.59	1.39276	0	0	0	0	0	0	0	0	0	0	0	0	0	0
247259	0	0	M	4	79	160.9	45	27.8	6.25	0.8	0	0	0	0	0	0	0	0	0	0	0	0	0	0
247260	0	1	F	4	70	153.5	53	14.1	4.28	1.16822	0	0	0	0	0	0	0	0	0	0	0	0	0	0
247262	0	0	M	4	80	164	72	19.7	7.1	0.704225	0	1	0	0	0	1	1	0	1	0	0	1	2	1
247263	0	0	M	3	73	173.5	71	45	5.36	0.932836	0	1	0	0	0	1	1	0	1	0	0	0	1	1
247264	0	1	F	5	74	149.35	49	11	18.81	0.265816
247265	0	1	F	3	84	148.3	46	16.9	9.75	0.512821	0	1	0	0	0	1	1	0	1	0	0	0	1	1
247266	0	0	M	3	92	173.5	51	21.1	8.29	0.603136	1	1	0	0	1	3	2	0	1	0	0	1	2	1
247267	0	0	M	5	79	176.65	68	22.7	12.87	0.3885
247268	0	1	F	4	84	146.2	49	10	13.57	0.36846	0	1	1	0	1	3	2	0	1	0	0	1	2	1
247270	1	0	M	1	85	161.95	56	21.2	5.81	0.860585	0	0	0	0	0	0	0	0	0	0	0	0	0	0
247271	0	0	M	4	79	165.1	60	28.5	4.27	1.17096	0	0	0	0	0	0	0	0	0	0	0	0	0	0
247272	0	0	M	5	87	157.75	50	20.7	11.28	0.443262	0	0	0	0	0	0	0	0	0	0	0	0	0	0
247273	0	0	M	3	84	160.9	55	11.7	9.6	0.520833
247274	1	1	F	5	63	163	40	20.1	24.39	0.205002
247275	0	0	M	1	69	158.8	78	26.9	3.75	1.33333
247278	0	0	M	1	68	170.35	56	33.4	5.9	0.847458	0	0	0	0	0	0	0	0	0	0	0	0	0	0
247279	0	0	M	1	67	174.5	61	27.6	5.28	0.94697
247280	0	0	M	3	58	164.05	58.9	18.1	11.78	0.424448	0	0	0	0	0	0	0	0	0	0	0	0	0	0
247281	0	1	F	1	84	147.3	45	19.6	7.77	0.643501	0	1	0	0	0	1	1	0	1	0	0	0	1	1
247282	0	0	M	2	78	167.2	55.5	25.2	8.62	0.580046	1	0	0	1	0	2	1	1	0	0	1	0	2	1
